# Supplementary material for: Ionothermal synthesis and characterization of two cluster chalcohalides: [Cr7S8Cl2(NH3)14.5(H2O)1.5]Cl3·H2O and [Emim]2[Sn2As2S4(S2)2Br2.43Cl1.56]
Source: Royal Society of Chemistry journal article supplement (doi:10.1039/c3ce40592c), 2013-01-01
Supplement: c3ce40592c.pdf [file c3ce40592c.pdf]

## **Ionothermal synthesis and characterization of two cluster chalcogenides: [Cr<sub>7</sub>S<sub>8</sub>Cl<sub>2</sub>(NH<sub>3</sub>)<sub>14.5</sub>(H<sub>2</sub>O)<sub>1.5</sub>]Cl<sub>3</sub>·H<sub>2</sub>O and [Emim]<sub>2</sub>[Sn<sub>2</sub>As<sub>2</sub>S<sub>4</sub>(S<sub>2</sub>)<sub>2</sub>Br<sub>2.43</sub>Cl<sub>1.56</sub>]**

Ke-Zhao Du<sup>a,b</sup>, Mei-Ling Feng<sup>a</sup>, Jian-Rong Li<sup>a</sup>, Xiao-Ying Huang<sup>a,\*</sup>

<sup>a</sup> State Key Laboratory of Structural Chemistry, Fujian Institute of Research on the Structure of Matter, the Chinese Academy of Sciences, Fuzhou, Fujian 350002, P.R.

<sup>b</sup> Graduate School of the Chinese Academy of Sciences, Beijing 100049, P. R. China

Fax: +86 591 83793727; Tel: +86 591 83793727; E-mail: [xyhuang@fjirsm.ac.cn](mailto:xyhuang@fjirsm.ac.cn)

### **Supporting Information**

#### **1. Synthesis**

All chemicals were commercially purchased and used without further purification. The ionic liquids [Bmmim]Cl, [Bmmim][BF<sub>4</sub>] and [Emim]Br were purchased from Lanzhou Greenchem ILS (LICP, CAS, China). The other chemicals were purchased from the Chinese vendors such as Sinopharm Chemical Reagent Co. Ltd.

Compound **1** was obtained from an ionothermal reaction. A mixture of CrCl<sub>3</sub>·6H<sub>2</sub>O powder (AR, 0.136 g, 0.510 mmol), S powder (CP, 0.098 g, 3.062 mmol), [Bmmim]Cl (>99%, 1.130 g, 5.988 mmol), urea (AR, 0.121 g, 2.015 mmol) and NH<sub>2</sub>NH<sub>2</sub>·H<sub>2</sub>O (85%, 0.5 mL, 8.5 mmol) were sealed in a stainless steel reactor with a 28 mL Teflon liner and kept at 160 °C for 6 days, and then was cooled to room temperature. Black sheet-like crystals were obtained by washed with ethanol and air-dried. The crystals were selected by hand (stable in the air) in 43% yield (0.035 g) based on CrCl<sub>3</sub>·6H<sub>2</sub>O. Elemental analysis of **1**: calcd (%): H 4.49, N 18.64; found: H 4.50, N 18.91. The [Bmmim]Cl was necessary for obtaining **1**, though it did not enter the final structure of **1**. Replacing it with 4 mL NH<sub>2</sub>NH<sub>2</sub>·H<sub>2</sub>O (25~28%) resulted in indefinite black powders, whereas replacing it with [Bmmim][BF<sub>4</sub>] (>99%) resulted in (NH<sub>4</sub>)<sub>3</sub>CrF<sub>6</sub> (Figure S1).<sup>1</sup>

Compound **2** was obtained from a mixture of Sn powder (>99.5%, 0.078 g, 0.65 mmol), S powder (CP, 0.064 g, 2.00 mmol), [Emim]Br (>99%, 1.32 g, 6.91 mmol),

As<sub>2</sub>S<sub>2</sub> powder (CP, 0.130 g, 0.61 mmol), AlCl<sub>3</sub> powder (AR, 0.131g, 0.98 mmol), EuCl<sub>3</sub>·6H<sub>2</sub>O powder (>99%, 0.177 g, 0.48 mmol) and thiourea powder (AR, 0.058 g, 0.76 mmol) were sealed in a stainless steel reactor with a 28 mL Teflon liner and kept at 160 °C for 8 days, and then was cooled to room temperature. Red block-like crystals were obtained by washed with ethanol and air-dried. The crystals were selected by hand (stable in the air) in 33% yield (0.093 g) based on As<sub>2</sub>S<sub>2</sub>. Elemental analysis calcd (%) of **2**: C 12.92, H 1.99, N 5.02; found: C 12.90, H 2.01, N 5.01. EuCl<sub>3</sub>·6H<sub>2</sub>O and AlCl<sub>3</sub> might form the binary EuCl<sub>3</sub>-AlCl<sub>3</sub> lewis acid,<sup>2</sup> and Br<sup>-</sup> is lewis base. When the lewis acid is excessive, the ionic liquid system is acidic which is in favour of the synthesis and crystallization of cationic cluster chalcogenides.<sup>3, 4</sup> When the ionic liquid containing Br<sup>-</sup> or Cl<sup>-</sup> anion is excessive, the system is alkaline which is in favour of the synthesis and crystallization of anionic cluster chalcogenide of **2**.

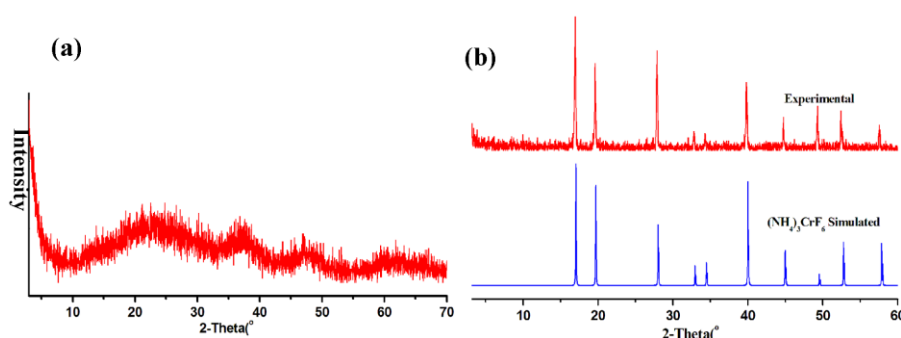

Figure S1. The PXRD patterns of the products obtained by replacing the [Bmmim]Cl with NH<sub>2</sub>NH<sub>2</sub>·H<sub>2</sub>O (25~28%) (a) and [Bmmim][BF<sub>4</sub>] (b), respectively, in the synthesis of **1**.

## 2. Crystal Structure

The intensity data were collected on an Oxford Xcalibur Eos CCD diffractometer with graphite-monochromated MoK $\alpha$  radiation ( $\lambda = 0.71073 \text{ \AA}$ ) at room temperature. The data were corrected for Lorentz and Polarization effects as well as for absorption. The structure was solved by direct methods and refined by full-matrix least-squares cycles in SHELX-97.<sup>5</sup> The selected bond geometries and hydrogen bonds data are listed in Table S1–S4. The empirical formulae were confirmed by element analyses (EA) results and energy-dispersive X-ray spectroscopy (EDS).

In the asymmetric unit of **1** there are three and half of crystallographically independent  $\text{Cr}^{3+}$  ions, four  $\text{S}^{2-}$ , one  $\text{Cl}^-$  anions, 1.5  $\text{H}_2\text{O}$ , 7.25  $\text{NH}_3$  as ligands and 1.5  $\text{Cl}^-$  as counterions and 0.5 lattice water molecule. The  $\text{Cr}(1)^{3+}$  ion are surrounded by six  $\mu_3\text{-S}^{2-}$  anions, and the  $\text{Cr}(3)^{3+}$  ion are surrounded by three  $\mu_3\text{-S}^{2-}$  anions and three terminal  $\text{NH}_3$  molecules. While the  $\text{Cr}(2)^{3+}$  and  $\text{Cr}(4)^{3+}$  ions coordinate to three  $\mu_3\text{-S}^{2-}$  anions, two terminal  $\text{NH}_3$  and one terminal  $\text{Cl}/\text{H}_2\text{O}$  ( $\text{NH}_3/\text{Cl}$  for  $\text{Cr}(4)$ ). The occupancy ratios of  $\text{Cl1B}/\text{O1}$  and  $\text{Cl1}/\text{N1B}$  were refined to be 0.25/0.75 and 0.75/0.25, respectively. There is one crystallographically independent  $\text{Sn}^{4+}$  ion, one  $\text{As}^{3+}$  ion, four S atom, 1.22  $\text{Br}^-$ , 0.78  $\text{Cl}^-$  and one  $\text{Emim}^+$  cation in the asymmetric unit of **2**. The occupancy ratios of terminal atoms  $\text{Br1}/\text{Cl1}$  and  $\text{Br2}/\text{Cl2}$  were refined to be 0.556(2)/0.440 and 0.661(2)/0.340, respectively.

CCDC-923296 and 923287 contains the supplementary crystallographic data of the crystal **1** of **2**. The data can be obtained free of charge at [www.ccdc.cam.ac.uk/conts/retrieving.html](http://www.ccdc.cam.ac.uk/conts/retrieving.html) or from the Cambridge Crystallographic Data Centre, 12, Union Road, Cambridge CB2 1EZ, UK.

**Table S1.** Selected bond lengths (Å) and angles (°) for compound **1**.

|                     |           |                   |            |
|---------------------|-----------|-------------------|------------|
| Cr(1)-S(1)          | 2.4002(8) | Cr(3)-N(4)        | 2.115(2)   |
| Cr(1)-S(1)#1        | 2.4002(8) | Cr(3)-N(3)        | 2.1241(19) |
| Cr(1)-S(3)#1        | 2.4132(8) | Cr(3)-S(1)        | 2.3578(7)  |
| Cr(1)-S(3)          | 2.4132(8) | Cr(3)-S(4)#1      | 2.3608(8)  |
| Cr(1)-S(4)          | 2.4266(6) | Cr(3)-S(2)        | 2.3962(8)  |
| Cr(1)-S(4)#1        | 2.4266(6) | Cr(4)-N(1B)       | 2.102(18)  |
| Cr(2)-N(1)          | 2.123(2)  | Cr(4)-N(7)        | 2.134(2)   |
| Cr(2)-N(2)          | 2.146(2)  | Cr(4)-N(6)        | 2.142(2)   |
| Cr(2)-O(1)          | 2.155(5)  | Cr(4)-S(1)        | 2.3518(8)  |
| Cr(2)-S(4)#1        | 2.3558(8) | Cr(4)-S(3)        | 2.3687(8)  |
| Cr(2)-S(3)          | 2.3600(7) | Cr(4)-S(2)        | 2.3803(7)  |
| Cr(2)-S(2)          | 2.3713(8) | Cr(4)-Cl(1)       | 2.4708(14) |
| Cr(2)-Cl(1B)        | 2.483(5)  | S(4)-Cr(2)#1      | 2.3558(8)  |
| Cr(3)-N(5)          | 2.107(2)  | S(4)-Cr(3)#1      | 2.3608(8)  |
|                     |           |                   |            |
| S(1)-Cr(1)-S(1)#1   | 91.39(4)  | N(5)-Cr(3)-S(4)#1 | 177.98(7)  |
| S(1)-Cr(1)-S(3)#1   | 178.47(3) | N(4)-Cr(3)-S(4)#1 | 90.09(7)   |
| S(1)#1-Cr(1)-S(3)#1 | 87.25(2)  | N(3)-Cr(3)-S(4)#1 | 91.93(6)   |
| S(1)-Cr(1)-S(3)     | 87.25(2)  | S(1)-Cr(3)-S(4)#1 | 91.42(3)   |

|                     |            |                      |           |
|---------------------|------------|----------------------|-----------|
| S(1)#1-Cr(1)-S(3)   | 178.47(3)  | N(5)-Cr(3)-S(2)      | 92.78(7)  |
| S(3)#1-Cr(1)-S(3)   | 94.11(4)   | N(4)-Cr(3)-S(2)      | 178.79(7) |
| S(1)-Cr(1)-S(4)     | 91.58(2)   | N(3)-Cr(3)-S(2)      | 94.10(7)  |
| S(1)#1-Cr(1)-S(4)   | 88.81(2)   | S(1)-Cr(3)-S(2)      | 89.56(3)  |
| S(3)#1-Cr(1)-S(4)   | 87.67(2)   | S(4)#1-Cr(3)-S(2)    | 88.94(3)  |
| S(3)-Cr(1)-S(4)     | 91.94(2)   | N(1B)-Cr(4)-N(7)     | 80.3(4)   |
| S(1)-Cr(1)-S(4)#1   | 88.81(2)   | N(1B)-Cr(4)-N(6)     | 77.3(5)   |
| S(1)#1-Cr(1)-S(4)#1 | 91.58(2)   | N(7)-Cr(4)-N(6)      | 85.23(9)  |
| S(3)#1-Cr(1)-S(4)#1 | 91.94(2)   | N(1B)-Cr(4)-S(1)     | 100.5(5)  |
| S(3)-Cr(1)-S(4)#1   | 87.67(2)   | N(7)-Cr(4)-S(1)      | 90.13(7)  |
| S(4)-Cr(1)-S(4)#1   | 179.44(4)  | N(6)-Cr(4)-S(1)      | 175.15(6) |
| N(1)-Cr(2)-N(2)     | 84.88(10)  | N(1B)-Cr(4)-S(3)     | 165.8(4)  |
| N(1)-Cr(2)-O(1)     | 86.23(15)  | N(7)-Cr(4)-S(3)      | 89.63(7)  |
| N(2)-Cr(2)-O(1)     | 85.35(18)  | N(6)-Cr(4)-S(3)      | 91.94(8)  |
| N(1)-Cr(2)-S(4)#1   | 90.42(7)   | S(1)-Cr(4)-S(3)      | 89.42(3)  |
| N(2)-Cr(2)-S(4)#1   | 175.28(7)  | N(1B)-Cr(4)-S(2)     | 101.5(4)  |
| O(1)-Cr(2)-S(4)#1   | 93.94(17)  | N(7)-Cr(4)-S(2)      | 178.07(8) |
| N(1)-Cr(2)-S(3)     | 90.79(7)   | N(6)-Cr(4)-S(2)      | 94.59(6)  |
| N(2)-Cr(2)-S(3)     | 89.88(6)   | S(1)-Cr(4)-S(2)      | 90.09(3)  |
| O(1)-Cr(2)-S(3)     | 174.58(16) | S(3)-Cr(4)-S(2)      | 88.45(3)  |
| S(4)#1-Cr(2)-S(3)   | 90.60(3)   | N(1B)-Cr(4)-Cl(1)    | 16.9(3)   |
| N(1)-Cr(2)-S(2)     | 179.66(7)  | N(7)-Cr(4)-Cl(1)     | 93.64(8)  |
| N(2)-Cr(2)-S(2)     | 95.04(7)   | N(6)-Cr(4)-Cl(1)     | 88.59(8)  |
| O(1)-Cr(2)-S(2)     | 94.10(14)  | S(1)-Cr(4)-Cl(1)     | 90.31(4)  |
| S(4)#1-Cr(2)-S(2)   | 89.66(3)   | S(3)-Cr(4)-Cl(1)     | 176.71(4) |
| S(3)-Cr(2)-S(2)     | 88.87(3)   | S(2)-Cr(4)-Cl(1)     | 88.27(4)  |
| N(1)-Cr(2)-Cl(1B)   | 98.67(14)  | Cr(4)-S(1)-Cr(3)     | 90.97(3)  |
| N(2)-Cr(2)-Cl(1B)   | 90.90(14)  | Cr(4)-S(1)-Cr(1)     | 92.02(3)  |
| O(1)-Cr(2)-Cl(1B)   | 13.2(2)    | Cr(3)-S(1)-Cr(1)     | 90.20(3)  |
| S(4)#1-Cr(2)-Cl(1B) | 89.38(13)  | Cr(2)-S(2)-Cr(4)     | 91.05(3)  |
| S(3)-Cr(2)-Cl(1B)   | 170.54(13) | Cr(2)-S(2)-Cr(3)     | 90.07(3)  |
| S(2)-Cr(2)-Cl(1B)   | 81.66(13)  | Cr(4)-S(2)-Cr(3)     | 89.36(3)  |
| N(5)-Cr(3)-N(4)     | 88.17(10)  | Cr(2)-S(3)-Cr(4)     | 91.62(3)  |
| N(5)-Cr(3)-N(3)     | 86.88(8)   | Cr(2)-S(3)-Cr(1)     | 90.95(3)  |
| N(4)-Cr(3)-N(3)     | 85.21(9)   | Cr(4)-S(3)-Cr(1)     | 91.29(3)  |
| N(5)-Cr(3)-S(1)     | 89.66(6)   | Cr(2)#1-S(4)-Cr(3)#1 | 91.31(3)  |
| N(4)-Cr(3)-S(1)     | 91.19(6)   | Cr(2)#1-S(4)-Cr(1)   | 90.72(3)  |
| N(3)-Cr(3)-S(1)     | 175.08(7)  | Cr(3)#1-S(4)-Cr(1)   | 89.49(3)  |

Symmetry transformations used to generate equivalent atoms: #1 -x+1, y, -z+1/2

**Table 2.** Selected bond lengths (Å) and angles (°) for compound **2**.

|             |           |              |            |
|-------------|-----------|--------------|------------|
| Sn(1)-Cl(1) | 2.394(14) | S(2)-Sn(1)#1 | 2.6340(10) |
| Sn(1)-Cl(2) | 2.473(15) | S(4)-As(1)#1 | 2.2128(13) |

|                    |            |                    |           |
|--------------------|------------|--------------------|-----------|
| Sn(1)-S(4)         | 2.4904(12) | N(1)-C(3)          | 1.287(7)  |
| Sn(1)-S(1)         | 2.4944(12) | N(1)-C(1)          | 1.356(7)  |
| Sn(1)-Br(2)        | 2.591(3)   | N(1)-C(4)          | 1.464(6)  |
| Sn(1)-Br(1)        | 2.604(4)   | N(2)-C(2)          | 1.301(11) |
| Sn(1)-S(2)#1       | 2.6340(10) | N(2)-C(3)          | 1.302(9)  |
| Sn(1)-S(2)         | 2.6434(10) | N(2)-C(5B)         | 1.524(10) |
| As(1)-S(1)         | 2.2098(13) | N(2)-C(5)          | 1.536(11) |
| As(1)-S(4)#1       | 2.2128(13) | C(1)-C(2)          | 1.328(10) |
| As(1)-S(3)         | 2.2732(13) | C(5)-C(6)          | 1.510(9)  |
| S(2)-S(3)          | 2.0346(16) | C(5B)-C(6B)        | 1.501(9)  |
|                    |            |                    |           |
| Cl(1)-Sn(1)-Cl(2)  | 87.0(6)    | Br(1)-Sn(1)-S(2)   | 89.15(14) |
| Cl(1)-Sn(1)-S(4)   | 90.9(4)    | S(2)#1-Sn(1)-S(2)  | 87.36(3)  |
| Cl(2)-Sn(1)-S(4)   | 99.3(4)    | S(1)-As(1)-S(4)#1  | 106.28(5) |
| Cl(1)-Sn(1)-S(1)   | 94.6(4)    | S(1)-As(1)-S(3)    | 99.27(5)  |
| Cl(2)-Sn(1)-S(1)   | 84.6(4)    | S(4)#1-As(1)-S(3)  | 100.30(5) |
| S(4)-Sn(1)-S(1)    | 173.44(4)  | As(1)-S(1)-Sn(1)   | 111.23(5) |
| Cl(1)-Sn(1)-Br(2)  | 93.3(5)    | S(3)-S(2)-Sn(1)#1  | 107.71(5) |
| Cl(2)-Sn(1)-Br(2)  | 7.3(3)     | S(3)-S(2)-Sn(1)    | 106.18(5) |
| S(4)-Sn(1)-Br(2)   | 95.62(7)   | Sn(1)#1-S(2)-Sn(1) | 92.64(3)  |
| S(1)-Sn(1)-Br(2)   | 87.70(7)   | S(2)-S(3)-As(1)    | 103.18(6) |
| Cl(1)-Sn(1)-Br(1)  | 3.4(6)     | As(1)#1-S(4)-Sn(1) | 110.16(5) |
| Cl(2)-Sn(1)-Br(1)  | 88.5(3)    | C(3)-N(1)-C(1)     | 108.1(6)  |
| S(4)-Sn(1)-Br(1)   | 87.69(13)  | C(3)-N(1)-C(4)     | 126.9(6)  |
| S(1)-Sn(1)-Br(1)   | 97.70(13)  | C(1)-N(1)-C(4)     | 125.0(5)  |
| Br(2)-Sn(1)-Br(1)  | 94.66(15)  | C(2)-N(2)-C(3)     | 107.2(7)  |
| Cl(1)-Sn(1)-S(2)#1 | 177.0(5)   | C(2)-N(2)-C(5B)    | 105.0(9)  |
| Cl(2)-Sn(1)-S(2)#1 | 95.1(3)    | C(3)-N(2)-C(5B)    | 147.7(9)  |
| S(4)-Sn(1)-S(2)#1  | 90.97(4)   | C(2)-N(2)-C(5)     | 144.3(10) |
| S(1)-Sn(1)-S(2)#1  | 83.43(4)   | C(3)-N(2)-C(5)     | 108.5(9)  |
| Br(2)-Sn(1)-S(2)#1 | 88.86(6)   | C(5B)-N(2)-C(5)    | 39.4(8)   |
| Br(1)-Sn(1)-S(2)#1 | 176.34(14) | C(2)-C(1)-N(1)     | 104.8(7)  |
| Cl(1)-Sn(1)-S(2)   | 90.4(5)    | N(2)-C(2)-C(1)     | 109.9(8)  |
| Cl(2)-Sn(1)-S(2)   | 174.1(3)   | N(1)-C(3)-N(2)     | 109.9(7)  |
| S(4)-Sn(1)-S(2)    | 86.00(4)   | C(6)-C(5)-N(2)     | 111.4(10) |
| S(1)-Sn(1)-S(2)    | 90.33(4)   | C(6B)-C(5B)-N(2)   | 94.6(8)   |
| Br(2)-Sn(1)-S(2)   | 175.92(7)  |                    |           |

Symmetry transformations used to generate equivalent atoms: #1 -x+1,-y+1,-z+1.

**Table S3** Selected hydrogen bond data for compound **1**.

| D-H...A              | <i>d</i> (D-H) (Å) | <i>d</i> (H...A) (Å) | <i>d</i> (D...A) (Å) | D-H...A (°) |
|----------------------|--------------------|----------------------|----------------------|-------------|
| O(1)-H(1D)...Cl(2)#2 | 0.82               | 2.78                 | 3.542(6)             | 154.8       |
| N(1B)-H(1G)...O(2)#3 | 0.89               | 2.18                 | 3.069(18)            | 173.1       |

|                       |      |      |           |       |
|-----------------------|------|------|-----------|-------|
| O(2)-H(2D)...S(1)#2   | 0.82 | 3.01 | 3.831(11) | 179.2 |
| O(2)-H(2E)...N(2)     | 0.82 | 2.51 | 3.258(10) | 152.8 |
| N(1)-H(1A)...Cl(3)    | 0.89 | 2.70 | 3.461(4)  | 143.6 |
| N(1)-H(1A)...Cl(3)#1  | 0.89 | 2.89 | 3.627(4)  | 141.2 |
| N(1)-H(1B)...Cl(2)#2  | 0.89 | 2.81 | 3.667(2)  | 162.1 |
| N(1)-H(1C)...Cl(1)#4  | 0.89 | 2.93 | 3.654(3)  | 140.2 |
| N(2)-H(2A)...O(2)     | 0.89 | 2.42 | 3.258(10) | 157.3 |
| N(2)-H(2A)...Cl(3)    | 0.89 | 2.82 | 3.632(4)  | 152.0 |
| N(2)-H(2B)...Cl(2)#5  | 0.89 | 2.68 | 3.526(3)  | 158.3 |
| N(2)-H(2C)...Cl(2)#2  | 0.89 | 2.57 | 3.419(2)  | 160.8 |
| N(4)-H(4A)...Cl(2)    | 0.89 | 2.94 | 3.720(2)  | 147.0 |
| N(4)-H(4B)...S(1)#1   | 0.89 | 2.71 | 3.376(2)  | 132.6 |
| N(4)-H(4B)...Cl(3)#6  | 0.89 | 2.92 | 3.614(4)  | 135.8 |
| N(4)-H(4C)...Cl(2)#7  | 0.89 | 2.67 | 3.521(2)  | 160.1 |
| N(5)-H(5A)...Cl(2)    | 0.89 | 2.53 | 3.416(2)  | 171.4 |
| N(5)-H(5B)...S(2)#5   | 0.89 | 2.78 | 3.448(2)  | 133.3 |
| N(5)-H(5B)...Cl(1B)#5 | 0.89 | 2.80 | 3.517(6)  | 138.9 |
| N(5)-H(5B)...Cl(1)    | 0.89 | 2.96 | 3.358(3)  | 109.4 |
| N(5)-H(5C)...O(2)#8   | 0.89 | 2.63 | 3.360(11) | 139.9 |
| N(5)-H(5C)...Cl(3)#8  | 0.89 | 2.92 | 3.624(4)  | 137.0 |
| N(3)-H(6A)...Cl(2)#7  | 0.89 | 2.82 | 3.598(2)  | 147.0 |
| N(3)-H(6B)...Cl(1)#5  | 0.89 | 2.77 | 3.537(2)  | 144.8 |
| N(3)-H(6B)...Cl(1B)   | 0.89 | 2.80 | 3.353(6)  | 121.4 |
| N(3)-H(6C)...Cl(2)    | 0.89 | 2.62 | 3.491(2)  | 165.0 |
| N(7)-H(7A)...Cl(1)#9  | 0.89 | 2.77 | 3.643(3)  | 166.8 |
| N(7)-H(7B)...S(4)     | 0.89 | 2.82 | 3.473(3)  | 131.5 |
| N(7)-H(7C)...O(2)#3   | 0.89 | 2.52 | 3.305(10) | 147.9 |
| N(7)-H(7C)...Cl(3)#3  | 0.89 | 2.96 | 3.727(5)  | 145.0 |
| N(6)-H(8A)...Cl(1)#9  | 0.89 | 2.91 | 3.753(3)  | 158.4 |
| N(6)-H(8B)...O(2)#3   | 0.89 | 2.64 | 3.424(11) | 148.0 |
| N(6)-H(8B)...Cl(3)#3  | 0.89 | 2.66 | 3.503(4)  | 158.4 |
| N(6)-H(8C)...Cl(2)#5  | 0.89 | 2.72 | 3.563(2)  | 158.6 |

Symmetry transformations used to generate equivalent atoms: #1  $-x+1, y, -z+1/2$ ; #2  $x, y+1, z$ ; #3  $-x+1/2, y-1/2, -z+1/2$ ; #4  $x+1/2, y+1/2, z$ ; #5  $-x+1/2, -y+1/2, -z$ ; #6  $-x+1, y-1, -z+1/2$ ; #7  $-x+1, -y, -z$ ; #8  $x, y-1, z$ ; #9  $-x+1/2, y+1/2, -z+1/2$ .

**Table S4.** Selected hydrogen bond data for compound 2.

| D-H...A              | $d(\text{D-H})$ (Å) | $d(\text{H...A})$ (Å) | $d(\text{D...A})$ (Å) | D-H...A (°) |
|----------------------|---------------------|-----------------------|-----------------------|-------------|
| C(1)-H(1A)...Cl(2)#2 | 0.93                | 2.83                  | 3.673(16)             | 151.8       |
| C(1)-H(1A)...Br(2)#2 | 0.93                | 3.08                  | 3.906(8)              | 148.7       |
| C(3)-H(3A)...Cl(1)#3 | 0.93                | 2.85                  | 3.62(2)               | 140.0       |
| C(3)-H(3A)...Br(1)#3 | 0.93                | 2.96                  | 3.728(9)              | 140.9       |
| C(2)-H(2A)...S(3)#4  | 0.93                | 2.98                  | 3.908(8)              | 172.9       |
| C(6)-H(6C)...S(3)#1  | 0.96                | 2.92                  | 3.735(14)             | 142.9       |



|                      |      |      |           |       |
|----------------------|------|------|-----------|-------|
| C(6)-H(6B)...S(4)#5  | 0.96 | 3.01 | 3.844(13) | 146.5 |
| C(6B)-H(6D)...S(4)#6 | 0.96 | 2.86 | 3.482(11) | 123.2 |
| C(6B)-H(6E)...S(3)#1 | 0.96 | 3.02 | 3.882(19) | 150.0 |

Symmetry transformations used to generate equivalent atoms: #1  $-x+1,-y+1,-z+1$ ; #2  $-x+1,y-1/2,-z+3/2$ ; #3  $x-1/2,y,-z+3/2$ ; #4  $x-1/2,-y+1/2,-z+1$ ; #5  $-x+1/2,y-1/2,z$ ; #6  $x-1/2,-y+3/2,-z+1$ .

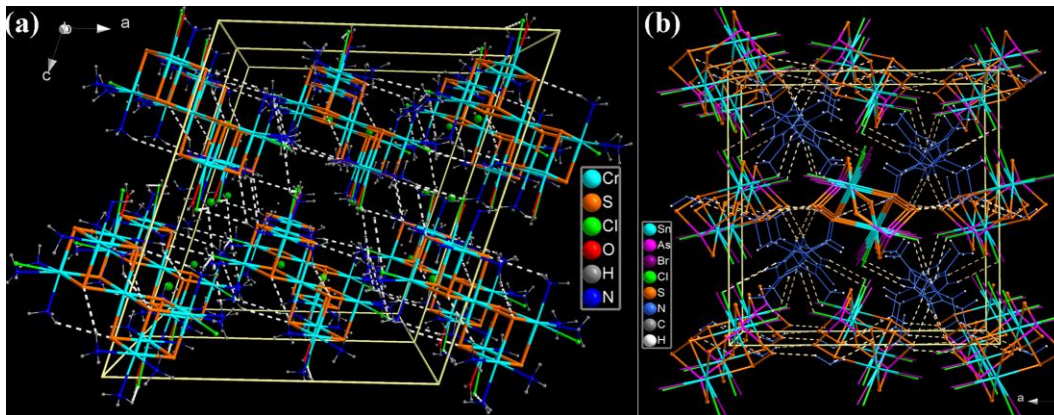

Figure S2. The H-bond networks in **1** (a) and **2** (b).

### 3. Physical measurements

All chemicals were used as purchased without further purification. Microprobe elemental analyses were performed by using a field-emission scanning electron microscope (FESEM, JSM6700F) equipped with an energy-dispersive X-ray spectroscope (EDS, Oxford INCA), whereas element analyses of C, H and N were performed on a German Elementar Vario EL III instrument. The infrared spectrum was taken on a Magna 750 FTIR spectrometer with sample as KBr pellet in the range of 4000–450  $\text{cm}^{-1}$ . Powder X-ray diffraction (PXRD) pattern was recorded on a Miniflex II diffractometer at 30 kV and 15 mA using  $\text{Cu } K\alpha$  (1.54178 Å), with a scan speed of 0.15°/min at room temperature. The simulated PXRD pattern from single crystal data was produced using the PowderCell program. Thermoanalysis (TG) was carried out with a NETZSCH STA449F3 unit, at a heating rate of 5 °C/min under a nitrogen atmosphere. Optical diffuse reflectance spectrum was measured at room temperature with a Perkin-Elmer Lambda 900 UV/Vis spectrophotometer by using  $\text{BaSO}_4$  powder as 100% reflectance and the room-temperature optical absorption spectrum of the title compound was obtained from diffuse reflectance experiment<sup>6,7</sup>. The variable-temperature magnetic susceptibilities (2~230k) were measured with a Quantum Design PPMS 6000 magnetometer under an applied field of 5000 Oe with the crystalline powder samples kept in a capsule for weighing.

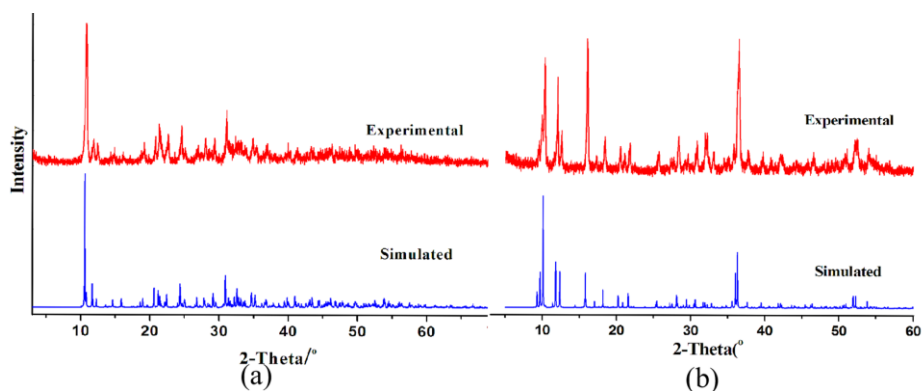

Figure S3. The PXRD patterns (red) are in good agreement with the simulated PXRD patterns (blue) for crystal structures of compounds **1** (b) and **2** (a).

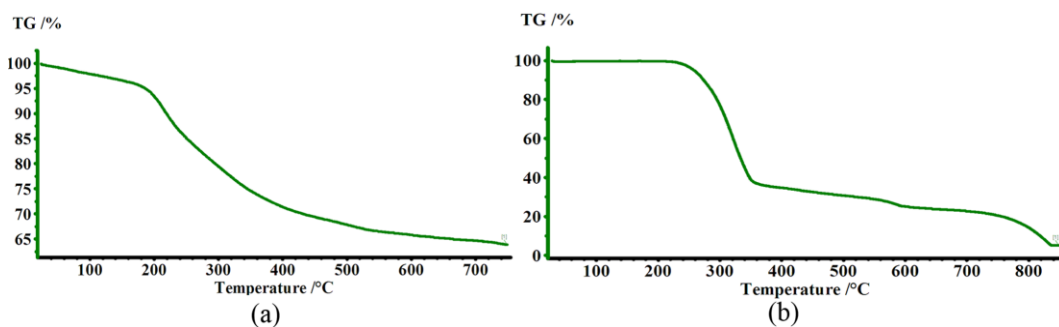

Figure S4. The TG curves for compound **1** (a) and **2** (b).

The phase purity of **1** and **2** were confirmed PXRD (Figure S3). Thermal stabilities of **1** and **2** were studied by thermogravimetric analyses (TGA) on pure crystalline samples (9.252 mg for **1** and 5.733 mg for **2**) in a NETZSCH STA449F3 unit and the TG curves are depicted in Figure S4. The TG curve of **1** indicates a weight loss of 4.14% from 25°C to 171°C, attributed to the removal of 2.5 H<sub>2</sub>O molecules per formula, consistent with the theoretical weight loss of 4.13%. Then **1** continues to lose a total weight of 31.57% from 171 to 730 °C, attributed to the removal of NH<sub>3</sub>, segmental S and Cl. Compound **2** was stable up to 200 °C, and then it decomposed with a weight loss of 94.56% from 200 to 840°C (Figure S7).

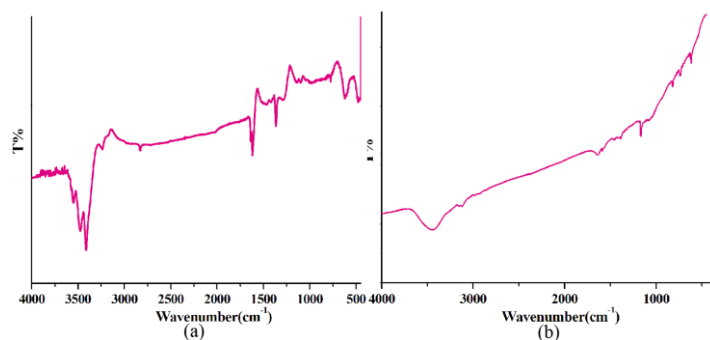

Figure S5 IR spectra of compound **1** (a) and **2** (b).



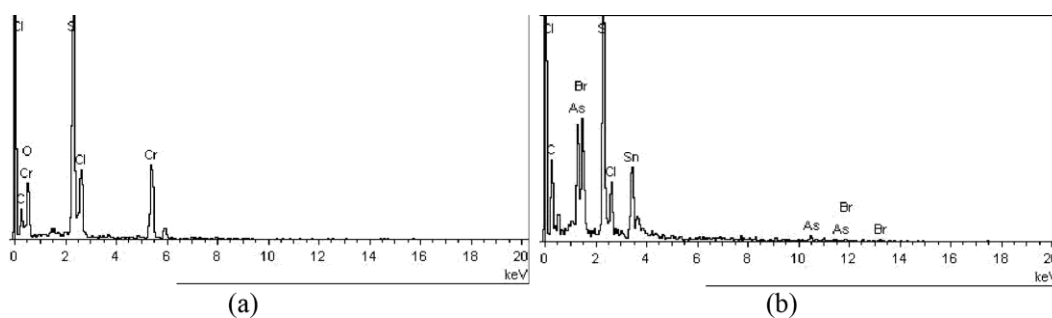

Figure S6 The EDS of compounds **1** (a) and **2** (b).

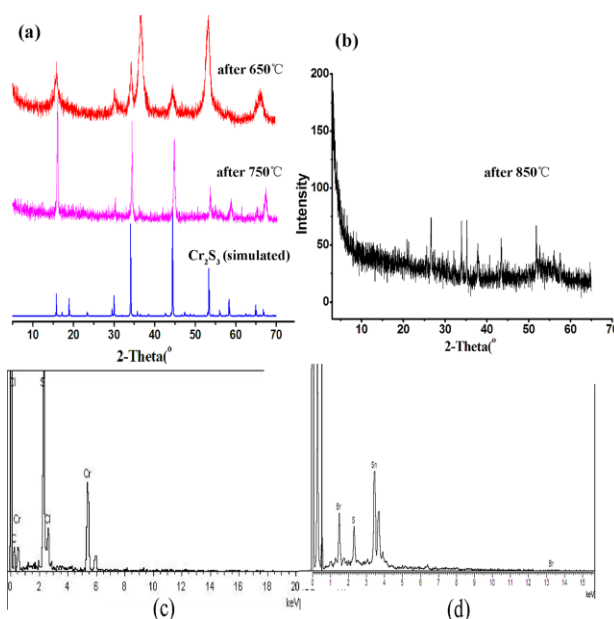

Figure S7 The PXRD patterns of the residues of **1** (a) and **2** (b) after TG. The residue of **1** after 750°C is comparable with that simulated from the single crystal X-ray data of  $\text{Cr}_2\text{S}_3$  (blue). The EDS of the residue of **1** (c) after 750°C and **2** (d) after 850°C.

## REFERENCES

1. Kenney, J. W.; Clymire, J. W.; Agnew, S. F., *J. Am. Chem. Soc.* **1995**, *117*, 1645-1646.
2. Murase, K. A.; Adachi, G.; Zissi, G. D.; Boghosian, S.; Papatheodorou, G. N., *J. Non-Cryst. Solids* **1994**, *180*, 88-90.
3. Zhang, Q.; Chung, I.; Jang, J. I.; Ketterson, J. B.; Kanatzidis, M. G., *J. Am. Chem. Soc.* **2009**, *131*, 9896-9897.
4. Biswas, K.; Zhang, Q. C.; Chung, I.; Song, J. H.; Androulakis, J.; Freeman, A. J.; Kanatzidis, M. G., *J. Am. Chem. Soc.* **2010**, *132*, 14760-14762.
5. Sheldrick, G. M., *SHELXS97 and SHELXL97*. University of Göttingen: Germany, 1997.
6. Wendlandt, W. W.; Hecht, H. G., *Reflectance spectroscopy*. Interscience Publishers: New York,, 1966; p viii, 298 p.
7. Li, J.; Chen, Z.; Wang, X. X.; Proserpio, D. M., *J. Alloys Compd.* **1997**, *262*, 28-33.
